# Supplementary material for: A novel rod-like MnO2@Fe loading on graphene giving excellent electromagnetic absorption properties
Source: Royal Society of Chemistry journal article supplement (doi:10.1039/c5tc00525f), 2015-01-01
Supplement: c5tc00525f1.pdf [file c5tc00525f1.pdf]

## Electronic Supplementary Information

A novel Rod-like  $\text{MnO}_2@Fe$  loading on Graphene with Excellent Electromagnetic Absorption Properties

Hualiang Lv<sup>a</sup>, Guangbin Ji<sup>a,\*</sup>, XiaoHui Liang<sup>a</sup>, Haiqian Zhang<sup>a</sup>, Youwei Du<sup>b</sup>

*College of Materials Science and Technology, Nanjing University of Aeronautics and Astronautics,  
Nanjing 210016, China;*

*Laboratory of Solid State Microstructures, Nanjing University, Nanjing 210093, P. R. China*

<sup>a</sup> Nanjing University of Aeronautics and Astronautics

<sup>b</sup> Laboratory of Solid State Microstructures, Nanjing University

\*E-mail: gbjj@nuaa.edu.cn

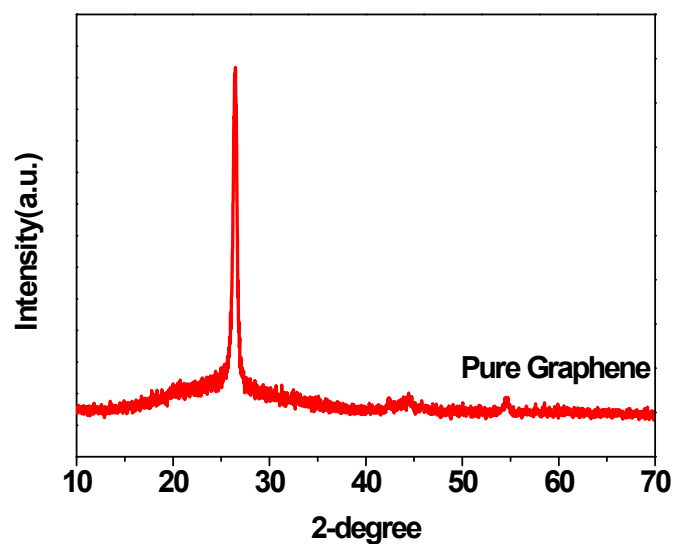

**Figure S1.** The XRD pattern of the graphene prepared by Hummers method.

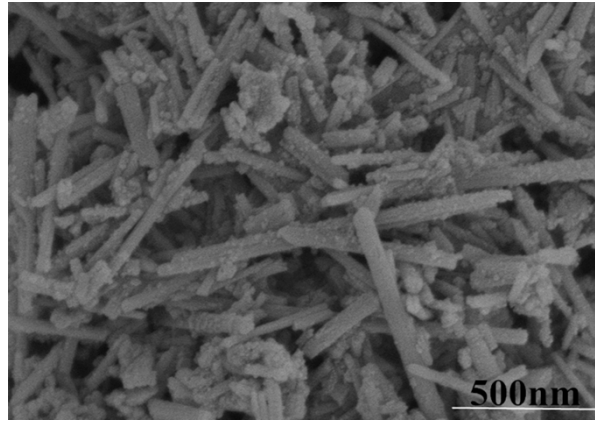

**Figure S2.** The  $\text{MnO}_2@\text{Fe}$  composite prepared with 3 hours.
